# Supplementary material for: Caveolin-1 modulates intraocular pressure: implications for caveolae mechanoprotection in glaucoma
Source: PubMed Central journal article supplement (PMC5107904; doi:10.1038/srep37127), 2016-11-14
Supplement: srep37127-s1.pdf [file srep37127-s1.pdf]

**Supplementary Information**

**Caveolin-1 modulates intraocular pressure: implications for caveolae mechanoprotection in glaucoma**

Michael H. Elliott<sup>1\*</sup>, Nicole E. Ashpole<sup>2</sup>, Xiaowu Gu<sup>1</sup>, Leonie Herrnberger<sup>3</sup>, Mark E. McClellan<sup>1</sup>, Gina L. Griffith<sup>1</sup>, Alaina M. Reagan<sup>1</sup>, Timothy M. Boyce<sup>1</sup>, Masaki Tanito<sup>4</sup>, Ernst R. Tamm<sup>3</sup>, and W. Daniel Stamer<sup>2</sup>

<sup>1</sup>Department of Ophthalmology/Dean McGee Eye Institute, University of Oklahoma Health Sciences Center, Oklahoma City, OK, 73104; <sup>2</sup>Department of Ophthalmology/Duke Eye Center, Duke University, Durham, NC 27710; <sup>3</sup>Institute of Human Anatomy and Embryology, Universität Regensburg, 93053 Regensburg, Germany; <sup>4</sup>Division of Ophthalmology, Matsue Red Cross Hospital, Matsue, Shimane 690-8506 Japan

**Supplementary Figure 1.**

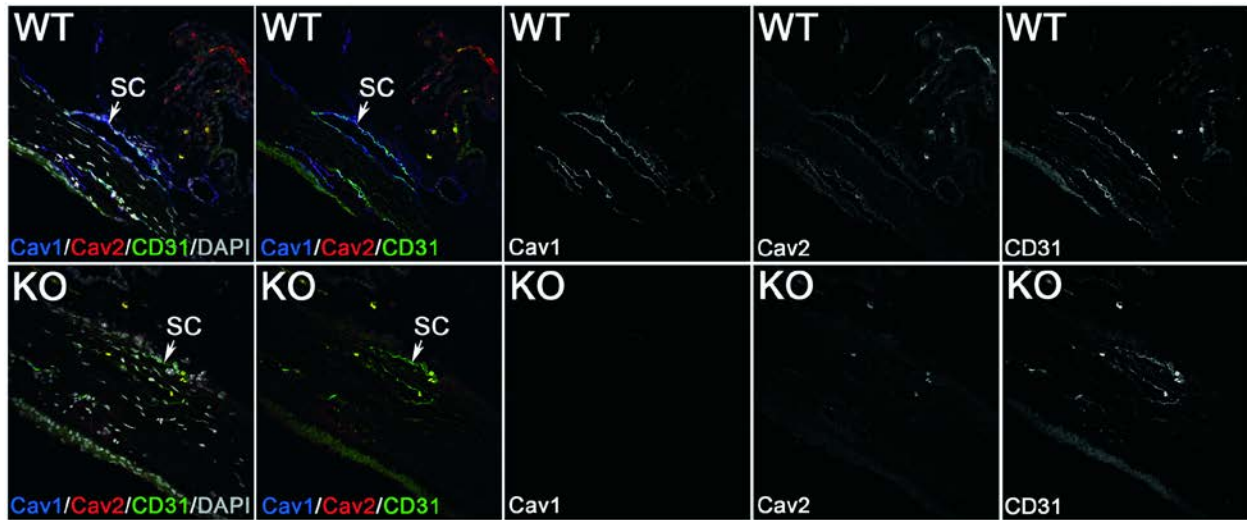

**Supplementary Figure 1.** Cav-2 immunoreactivity (red in merged images and grayscale in isolated channel) is reduced in *Cav1*<sup>-/-</sup> outflow pathway. Cav-1 (blue in merged images and grayscale in isolated channels), Cav-2, and CD31 (green in merged images and grayscale in isolated channels) colocalize in Schlemm's canal (SC) in wild-type mice (*upper panels*). Cav-1 is absent and Cav-2 is reduced in the SC of *Cav1*<sup>-/-</sup> mice demonstrating that Cav-2 cannot compensate for loss of Cav-1.

**Supplementary Figure 2.**

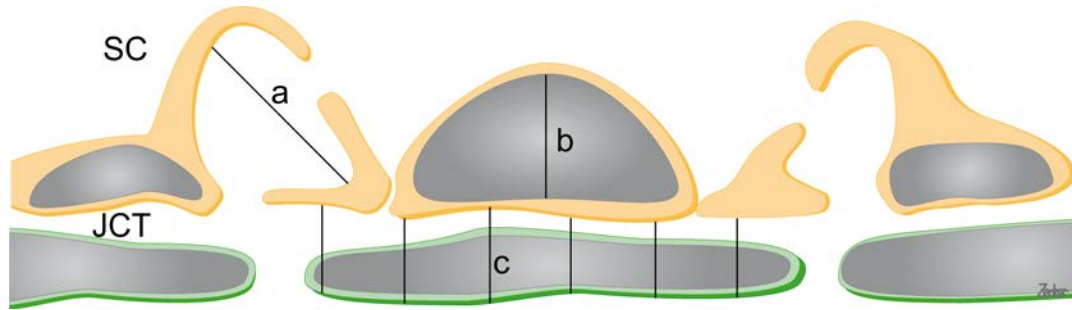

**Supplementary Figure 2.** Schematic of quantitative transmission electron microscopy analyses. Measurement “a” is GV diameter, “b” is endothelial nuclei thickness, and “c” is juxtacanalicular connective tissue (JCT) depth.
